# Supplementary material
Source: Research Square preprint supplement (doi:10.21203/rs.3.rs-12907/v4)
Supplement: Supplementary file 1 [file 874be85b7dfd4619eeeefd14.docx]

|  | | (1) |
| --- | --- | --- |
|  |  | (2) | |
